# Supplementary material for: Impact of Operational Factors, Inoculum Origin, and Feedstock Preservation on the Biochemical Methane Potential
Source: MDPI journal article supplement (doi:10.3390/bioengineering8110176), 2021-11-05
Supplement: s1 [file s1]

# Impact of Operational Factors, Inoculum Origin, and Feedstock Preservation on the Biochemical Methane Potential

Audrey Lallement, Aline Siaud, Christine Peyrelasse, Prasad Kaparaju, Blandine Schraauwers, Samuel Maunas and Florian Monlau

**Table S1.** The influence of source of inoculum on methane production from different substrates reported in literature. % referred to wet weight. n.i for not indicated.

| Inoculum sources                                                    | BMP test conditions or pilots | Methane production (NL CH <sub>4</sub> kg <sup>-1</sup> VS) |            |               |               | Ref. |
|---------------------------------------------------------------------|-------------------------------|-------------------------------------------------------------|------------|---------------|---------------|------|
| Substrates                                                          |                               | Liquide pig manure                                          |            | Sludge        |               |      |
| Industrial digester (brewery waste)                                 | 54°C, ISR = 2                 | 330 ± 38                                                    |            | 406 ± 45      |               | [1]  |
| Agricultural digester (manure)                                      |                               | 137 ± 28                                                    |            | 304 ± 45      |               |      |
| Territorial digester                                                |                               | n.i                                                         |            | 347 ± 14      |               |      |
| Agricultural digester (manure and energy crop)                      |                               | n.i                                                         |            | 455 ± 26      |               |      |
| Substrates                                                          |                               | Cellulose                                                   | Cow manure | Maize silage  | Wheat straw   |      |
| Horsens (100% Sludge municipal WWTP)                                | 35°C, ISR = 0.91              | 328                                                         | 234        | 299           | 280           | [2]  |
| Bånlev (75% animal manure and 25% industrial waste)                 | 35°C, ISR = 0.79              | 328                                                         | 136        | 219           | 177           |      |
| Foulum (80% manure and 20% maize and grass)                         | 53°C, ISR = 1.21              | 282                                                         | 245        | 334           | 301           |      |
| Thorsø (75% animal manure, 23% industrial waste and 2% maize/grass) | 53°C, ISR = 0.93              | 399                                                         | 249        | 287           | 266           |      |
| Substrates                                                          |                               | Ensiled sorghum                                             |            |               |               |      |
| Waste activated sludge digester (WW)                                | 35°C, ISR = 1                 | 248 ± 20                                                    |            |               |               | [3]  |
| Agricultural biogas plant (AGR)                                     |                               | 274 ± 18                                                    |            |               |               |      |
| UASB reactor treating wastewater (GR)                               |                               | 246 ± 15                                                    |            |               |               |      |
| A mix of WW and AGR                                                 |                               | 265 ± 12                                                    |            |               |               |      |
| Substrates                                                          |                               | Cow manure                                                  |            |               |               |      |
| From Foulum research center                                         | Pilot thermophilic, ISR = 1   | 325 ± 17                                                    |            |               |               | [4]  |
|                                                                     | Pilot mesophilic, ISR = 1     | 325 ± 22                                                    |            |               |               |      |
| Substrates                                                          |                               | Slurries from                                               | dairy cow  | fattening pig | forrowing sow |      |
| Sludge municipal WWTP                                               | 30°C, ISR = 0.5 - 1           |                                                             | 257        | 261           | 416           | [5]  |
| Agricultural : Swine slurry                                         |                               |                                                             | 244        | 272           | 408           |      |

**Table S2.** The effect of freezing/thawing cycle on methane production of different substrates. Where n.i: not indicated;  $\Delta$  is calculated by  $(V_{CH_4} \text{ frozen} - V_{CH_4} \text{ fresh}) / V_{CH_4} \text{ fresh}$ ; +:  $V_{CH_4} \text{ frozen} > V_{CH_4} \text{ fresh}$ ; -:  $V_{CH_4} \text{ fresh} > V_{CH_4} \text{ frozen}$  and \*: significant impact.

| Substrates                                           | TS       | Freezing conditions           | BMP test condition or pilots | Methane potential (NL CH <sub>4</sub> kg <sup>-1</sup> VS) |        |                     | Ref. |
|------------------------------------------------------|----------|-------------------------------|------------------------------|------------------------------------------------------------|--------|---------------------|------|
|                                                      | % Weight |                               |                              | Fresh                                                      | Frozen | $\Delta$            |      |
| Green waste grinded at 4 mm                          | n.i      | n.i                           | Mesophilic<br>ISR = 4        | 107                                                        | 113    | +6% <sup>+</sup>    | [6]  |
| Green waste grinded at 10 mm                         | n.i      |                               |                              | 117                                                        | 120    | +3% <sup>+</sup>    |      |
| Food waste from restaurant and supermarket (lavures) | n.i      |                               |                              | 536                                                        | 555    | +4% <sup>+</sup>    |      |
| Food waste                                           | 17%      | 24h at -20°C then 12h at 25°C | Pilot mesophilic             | 300                                                        | 320    | +7% <sup>+</sup> *  | [7]  |
| Grass                                                | 17%      | 6 days at -18°C               | Thermophilic<br>ISR = 1      | 368                                                        | 397    | +8% <sup>+</sup>    | [2]  |
| Maize                                                | 29%      |                               |                              | 431                                                        | 363    | -16% <sup>-</sup> * |      |
| Wet straw                                            | 86%      |                               |                              | 346                                                        | 317    | -8% <sup>-</sup>    |      |
| WWTP sludge                                          | 3%       | 24h at -25°C then 12h at 20°C | Pilot mesophilic             | 497                                                        | 727    | +46% <sup>+</sup> * | [8]  |

## REFERENCE

1. de Vrieze, J.; Raport, L.; Willems, B.; Verbrugge, S.; Volcke, E.; Meers, E.; Angenent, L.T.; Boon, N. Inoculum selection influences the biochemical methane potential of agro-industrial substrates. *Microb. Biotechnol.* **2015**, *8*, 776–786.
2. Moset, V.; Al-zohairi, N.; Møller, H.B. The impact of inoculum source, inoculum to substrate ratio and sample preservation on methane potential from different substrates. *Biomass Bioenergy* **2015**, *83*, 474–482.
3. Anderson, G.K.; Yang, G. Determination of bicarbonate and total volatile acid concentration in anaerobic digesters using a simple titration. *Water Environ. Res.* **1992**, *64*, 53–59.
4. Achinas, S.; Euverink, G.J.W. Theoretical analysis of biogas potential prediction from agricultural waste. *Resour. -Effic. Technol.* **2016**, *2*, 143–147.
5. Vedrenne, F.; Béline, F.; Dabert, P.; Bernet, N. The effect of incubation conditions on the laboratory measurement of the methane producing capacity of livestock wastes. *Bioresour. Technol.* **2008**, *99*, 146–155.

6. Hack, G.; de Fruteau Laclos, H.; Holliger, C. *Détermination de la Production de Méthane d'installations de Digestion Industrielles à Partir de Tests BMP en Laboratoire*; Office Fédérale de l'Energie: Ittigen, Switzerland, 2015, 1–76.
7. Stabnikova, O.; Liu, X.Y.; Wang, J.Y. Digestion of frozen/thawed food waste in the hybrid anaerobic solid–liquid system. *Waste Manag.* **2008**, *28*, 1654–1659.
8. Montusiewicz, A.; Lebiocka, M.; Rożej, A.; Zacharska, E.; Pawłowski, L. Freezing/thawing effects on anaerobic digestion of mixed sewage sludge. *Bioresour. Technol.* **2010**, *101*, 3466–3473.
